# Supplementary material
Source: Springer Nature journal article supplement (https://www.springermedizin.de/resource/supplementary/12985_2009_746_MOESM2_ESM.pdf/9608574)
Supplement: MOESM2 [file 9608574]

|         |     |     |     |     |     |     |     |     |     |     |     |     |     |      |     |     |     |     |     |     |       |
|---------|-----|-----|-----|-----|-----|-----|-----|-----|-----|-----|-----|-----|-----|------|-----|-----|-----|-----|-----|-----|-------|
| SENV-D  | CTA | AGC | AGC | CCT | AAC | ACT | CAT | CCA | GGC | ATG | CTT | ATG | CAG | CAA  | AAA | AGA | AAG | ATA | CTC | GTC | [60]  |
| SENV-D1 | ... | ... | ... | ... | ... | ... | ... | ... | ... | ... | A.. | ... | ... | ...  | ..G | ... | ..A | T.. | .AA | ..G | [60]  |
| SENV-D2 | ... | ... | ... | ... | ... | ... | ... | ... | ... | ... | ... | ... | ..C | ...  | ..G | ... | ..A | G.. | ..A | ..G | [60]  |
|         |     |     |     |     |     |     |     |     |     |     |     |     |     |      |     |     |     |     |     |     |       |
| SENV-D  | CCT | AGC | -TG | GGA | CAC | GTA | TCC | CAG | AGG | CAG | AAA | ATA | TGT | TCT  | AGC | TAA | AAT | ACC | ACC | CCC | [120] |
| SENV-D1 | ... | ... | A.. | ... | ... | C.. | ... | ..A | ... | ... | ... | ... | ... | ..T. | ... | ... | ... | ... | ... | ... | [120] |
| SENV-D2 | ... | ... | A.. | ... | ... | C.. | ... | ..A | ... | ... | ... | ... | ... | ..T. | ... | ... | ... | ... | ... | ... | [120] |
|         |     |     |     |     |     |     |     |     |     |     |     |     |     |      |     |     |     |     |     |     |       |
| SENV-D  | CAA | ACT | ATT | TGA | AGA | CCA | CTG | GTA | CAC | TCA | GCC | AGA | CTT | ATG  | CAA | AGT | TCC | TCT | TGT | AAC | [180] |
| SENV-D1 | ... | ... | ... | ... | ... | ... | ... | ... | ... | ... | ... | ... | ... | ...  | ... | ... | ... | ... | ... | ... | [180] |
| SENV-D2 | ... | ... | ... | ... | ... | ... | ... | ... | ... | ... | ... | ... | ... | ...  | ... | ... | ... | ... | ... | ... | [180] |
|         |     |     |     |     |     |     |     |     |     |     |     |     |     |      |     |     |     |     |     |     |       |
| SENV-D  | TTT | GCG | GTC | AAC | TGC |     |     |     |     |     |     |     |     |      |     |     |     |     |     |     | [195] |
| SENV-D1 | ... | ... | ... | ... | ... |     |     |     |     |     |     |     |     |      |     |     |     |     |     |     | [195] |
| SENV-D2 | ... | ... | ... | ... | ... |     |     |     |     |     |     |     |     |      |     |     |     |     |     |     | [195] |
|         |     |     |     |     |     |     |     |     |     |     |     |     |     |      |     |     |     |     |     |     |       |
| SENV-H  | TTT | GGC | TGC | ACC | TTC | TGG | TTC | TAC | AGA | CAC | CCA | GAG | GTG | GAT  | TTT | GTA | GCT | CAA | TTT | GAC | [60]  |
| SENV-H1 | ... | ... | ... | ... | ... | ... | ... | ... | ... | ... | ... | ..T | ..T | ..C  | ... | A.. | ... | ..G | ... | ... | [60]  |
| SENV-H2 | ... | ... | ... | ... | ... | ... | ... | ... | ... | ... | ... | ..A | ... | ..C  | ... | ... | ... | ..G | ... | ... | [60]  |
|         |     |     |     |     |     |     |     |     |     |     |     |     |     |      |     |     |     |     |     |     |       |
| SENV-H  | AAC | GTT | CCC | CCA | ATG | AAA | ATG | GAC | GAG | AAC | ACA | GCC | CCT | AAC  | ACT | CAC | CCA | TCA | TTT | CT  | [119] |
| SENV-H1 | ... | ... | ... | ... | ... | ... | ... | ... | ... | ... | ... | ... | ... | ...  | ... | ... | ... | ... | ... | ..  | [119] |
| SENV-H2 | ... | ... | ... | ..C | ... | ... | ... | ... | ... | ... | ... | ... | ... | ...  | ... | ... | ... | ... | ... | ..  | [119] |
